# Supplementary material
Source: MDPI journal article supplement (https://www.mdpi.com/2311-7524/9/10/1152)
Supplement: s1 [file s1 › horticulturae-2620371-supplementary.pdf]

**Supplement 1.** Contingency tables with corresponding residuals for the analyses of responses to multiple choice questions within respondents' categories

**Table S1.** Contingency table with corresponding residuals with regard to question number 7, in correlation to respondents' age in both years of investigation.

| How did you find out about the mentioned term? |           |                                      |           |                  |           |                            |           |                          |           |                            |           |          |
|------------------------------------------------|-----------|--------------------------------------|-----------|------------------|-----------|----------------------------|-----------|--------------------------|-----------|----------------------------|-----------|----------|
| I hear it now for the first time               |           | From family member, neighbor, friend |           | Via the internet |           | From the newspaper/journal |           | Via the television/radio |           | Other: (write your answer) |           |          |
| Age                                            | Frequency | Residual                             | Frequency | Residual         | Frequency | Residual                   | Frequency | Residual                 | Frequency | Residual                   | Frequency | Residual |
| <b>2019</b>                                    |           |                                      |           |                  |           |                            |           |                          |           |                            |           |          |
| < 25                                           | 13        | -0.01285                             | 13        | 0.01403          | 27        | 0.00465                    | 6         | 0.00073                  | 6         | -0.00383                   | 5         | -0.00273 |
| 25 – 40                                        | 64        | 0.01735                              | 20        | -0.00966         | 72        | -0.02003                   | 18        | -0.00031                 | 27        | 0.00820                    | 21        | 0.00445  |
| 41 – 65                                        | 24        | -0.00450                             | 9         | -0.00437         | 42        | 0.01538                    | 8         | -0.00042                 | 9         | -0.00437                   | 8         | -0.00172 |
| > 65                                           | 0         | 0.00000                              | 0         | 0.00000          | 0         | 0.00000                    | 0         | 0.00000                  | 0         | 0.00000                    | 0         | 0.00000  |
| Total:                                         | 101       |                                      | 42        |                  | 141       |                            | 32        |                          | 42        |                            | 34        |          |
| <b>2023</b>                                    |           |                                      |           |                  |           |                            |           |                          |           |                            |           |          |
| < 25                                           | 7         | 0.00704                              | 8         | 0.01074          | 6         | -0.01222                   | 1         | -0.00037                 | 1         | -0.00815                   | 4         | 0.00296  |
| 25 – 40                                        | 35        | 0.01770                              | 24        | -0.02305         | 56        | 0.00329                    | 6         | -0.00192                 | 15        | -0.01468                   | 24        | 0.01866  |
| 41 – 65                                        | 9         | -0.02333                             | 19        | 0.01370          | 30        | 0.00778                    | 4         | 0.00259                  | 15        | 0.02000                    | 4         | -0.02074 |
| > 65                                           | 0         | -0.00140                             | 0         | -0.00140         | 1         | 0.00115                    | 0         | -0.00030                 | 1         | 0.00283                    | 0         | -0.00088 |
| Total:                                         | 51        |                                      | 51        |                  | 93        |                            | 11        |                          | 32        |                            | 32        |          |

Note: The frequency represents the number of responses per respondents' category, while residuals were calculated as the difference between the observed and expected proportions.

**Table S2.** Contingency table with corresponding residuals with regard to question number 7, in correlation to the occupation of respondents in both years of investigation.

| How did you find out about the mentioned term? |                                  |          |                                      |          |                  |          |                            |          |                          |          |                            |          |
|------------------------------------------------|----------------------------------|----------|--------------------------------------|----------|------------------|----------|----------------------------|----------|--------------------------|----------|----------------------------|----------|
| Occupation                                     | I hear it now for the first time |          | From family member, neighbor, friend |          | Via the internet |          | From the newspaper/journal |          | Via the television/radio |          | Other: (write your answer) |          |
|                                                | Frequency                        | Residual | Frequency                            | Residual | Frequency        | Residual | Frequency                  | Residual | Frequency                | Residual | Frequency                  | Residual |
| <b>2019</b>                                    |                                  |          |                                      |          |                  |          |                            |          |                          |          |                            |          |
| Pupil / student                                | 16                               | -0.00454 | 11                                   | 0.00920  | 24               | -0.00209 | 6                          | 0.00094  | 6                        | -0.00355 | 6                          | 0.00004  |
| Employed                                       | 69                               | 0.00250  | 26                                   | -0.00583 | 96               | 0.00266  | 22                         | 0.00115  | 29                       | 0.00182  | 22                         | -0.00229 |
| Unemployed                                     | 16                               | 0.00401  | 5                                    | -0.00255 | 19               | -0.00292 | 3                          | -0.00401 | 7                        | 0.00255  | 6                          | 0.00292  |
| Retiree                                        | 0                                | -0.00197 | 0                                    | -0.00082 | 2                | 0.00235  | 1                          | 0.00193  | 0                        | -0.00082 | 0                          | -0.00066 |
| Total:                                         | 101                              |          | 42                                   |          | 141              |          | 32                         |          | 42                       |          | 34                         |          |
| <b>2023</b>                                    |                                  |          |                                      |          |                  |          |                            |          |                          |          |                            |          |
| Pupil / student                                | 7                                | 0.00844  | 5                                    | 0.00103  | 7                | -0.00597 | 1                          | -0.00007 | 2                        | -0.00357 | 3                          | 0.00014  |
| Employed                                       | 39                               | -0.00247 | 36                                   | -0.01358 | 76               | 0.01358  | 9                          | 0.00165  | 25                       | 0.00041  | 25                         | 0.00041  |
| Unemployed                                     | 5                                | -0.00037 | 6                                    | 0.00333  | 8                | -0.00481 | 1                          | -0.00037 | 3                        | -0.00074 | 4                          | 0.00296  |
| Retiree                                        | 0                                | -0.00560 | 4                                    | 0.00922  | 2                | -0.00280 | 0                          | -0.00121 | 2                        | 0.00390  | 0                          | -0.00351 |
| Total:                                         | 51                               |          | 51                                   |          | 93               |          | 11                         |          | 32                       |          | 32                         |          |

Note: The frequency represents the number of responses per respondents' category, while residuals were calculated as the difference between the observed and expected proportions.

**Table S3.** Contingency table with corresponding residuals with regard to question number 7, in correlation to the education of respondents in both years of investigation.

| Education                  | How did you find out about the mentioned term? |          |                                      |          |                  |          |                            |          |                          |          |                            |          |
|----------------------------|------------------------------------------------|----------|--------------------------------------|----------|------------------|----------|----------------------------|----------|--------------------------|----------|----------------------------|----------|
|                            | I hear it now for the first time               |          | From family member, neighbor, friend |          | Via the internet |          | From the newspaper/journal |          | Via the television/radio |          | Other: (write your answer) |          |
|                            | Frequency                                      | Residual | Frequency                            | Residual | Frequency        | Residual | Frequency                  | Residual | Frequency                | Residual | Frequency                  | Residual |
| <b>2019</b>                |                                                |          |                                      |          |                  |          |                            |          |                          |          |                            |          |
| Elementary school          | 2                                              | -0.00081 | 1                                    | 0.00009  | 3                | -0.00061 | 1                          | 0.00068  | 1                        | 0.00009  | 1                          | 0.00056  |
| High school                | 25                                             | -0.00327 | 18                                   | 0.01804  | 32               | -0.01196 | 7                          | -0.00338 | 10                       | -0.00237 | 10                         | 0.00294  |
| Faculty – bachelor studies | 36                                             | -0.01267 | 16                                   | -0.00264 | 65               | 0.01992  | 13                         | 0.00005  | 19                       | 0.00501  | 10                         | -0.00967 |
| Faculty – master studies   | 29                                             | 0.01351  | 6                                    | -0.00984 | 30               | -0.00789 | 8                          | 0.00125  | 10                       | 0.00036  | 9                          | 0.00260  |
| Faculty – doctoral studies | 9                                              | 0.00324  | 1                                    | -0.00565 | 11               | 0.00053  | 3                          | 0.00141  | 2                        | -0.00310 | 4                          | 0.00357  |
| Total:                     | 101                                            |          | 42                                   |          | 141              |          | 32                         |          | 42                       |          | 34                         |          |
| <b>2023</b>                |                                                |          |                                      |          |                  |          |                            |          |                          |          |                            |          |
| Elementary school          | 1                                              | 0.00230  | 1                                    | 0.00230  | 0                | -0.00255 | 0                          | -0.00030 | 0                        | -0.00088 | 0                          | -0.00088 |
| High school                | 7                                              | -0.01955 | 21                                   | 0.03230  | 20               | -0.00885 | 4                          | 0.00501  | 10                       | 0.00850  | 3                          | -0.01742 |
| Faculty – bachelor studies | 28                                             | 0.03794  | 14                                   | -0.01391 | 28               | -0.01621 | 4                          | 0.00063  | 15                       | 0.01429  | 5                          | -0.02274 |
| Faculty – master studies   | 13                                             | 0.00267  | 7                                    | -0.01955 | 25               | 0.00967  | 1                          | -0.00610 | 6                        | -0.00631 | 13                         | 0.01962  |
| Faculty – doctoral studies | 2                                              | -0.02337 | 8                                    | -0.00115 | 20               | 0.01794  | 2                          | 0.00077  | 1                        | -0.01561 | 11                         | 0.02143  |
| Total:                     | 51                                             |          | 51                                   |          | 93               |          | 11                         |          | 32                       |          | 32                         |          |

Note: The frequency represents the number of responses per respondents' category, while residuals were calculated as the difference between the observed and expected proportions.

**Table S4.** Contingency table with corresponding residuals with regard to question number 14, in correlation to respondents' age in both years of investigation.

| Would you participate in maintaining an urban garden in your neighborhood/part of the city, without monetary compensation? |                                                       |          |                                                                  |          |                                                                        |          |                                                                |          |                                 |          |                        |          |                            |          |
|----------------------------------------------------------------------------------------------------------------------------|-------------------------------------------------------|----------|------------------------------------------------------------------|----------|------------------------------------------------------------------------|----------|----------------------------------------------------------------|----------|---------------------------------|----------|------------------------|----------|----------------------------|----------|
|                                                                                                                            | Yes, if it were possible for me to use produced food. |          | Yes, if the produced food is intended for humanitarian purposes. |          | Yes, I consider it a great opportunity for socializing and relaxation. |          | Yes, if all the resources needed for production were provided. |          | No, I'm not interested in that. |          | No, I don't have time. |          | Other: (write your answer) |          |
| Age                                                                                                                        | Freq.                                                 | Res.     | Freq.                                                            | Res.     | Freq.                                                                  | Res.     | Freq.                                                          | Res.     | Freq.                           | Res.     | Freq.                  | Res.     | Freq.                      | Res.     |
| <b>2021</b>                                                                                                                |                                                       |          |                                                                  |          |                                                                        |          |                                                                |          |                                 |          |                        |          |                            |          |
| < 25                                                                                                                       | 15                                                    | -0.00333 | 18                                                               | 0.00160  | 10                                                                     | -0.01008 | 16                                                             | 0.01325  | 7                               | 0.00993  | 11                     | -0.00968 | 0                          | -0.00169 |
| 25 – 40                                                                                                                    | 66                                                    | 0.01230  | 64                                                               | 0.00323  | 54                                                                     | 0.00063  | 26                                                             | -0.01887 | 5                               | -0.00664 | 61                     | 0.00917  | 3                          | 0.00017  |
| 41 – 65                                                                                                                    | 22                                                    | -0.00897 | 25                                                               | -0.00483 | 28                                                                     | 0.00945  | 18                                                             | 0.00562  | 2                               | -0.00329 | 25                     | 0.00051  | 2                          | 0.00151  |
| > 65                                                                                                                       | 0                                                     | 0.00000  | 0                                                                | 0.00000  | 0                                                                      | 0.00000  | 0                                                              | 0.00000  | 0                               | 0.00000  | 0                      | 0.00000  | 0                          | 0.00000  |
| Total:                                                                                                                     | 103                                                   |          | 107                                                              |          | 92                                                                     |          | 60                                                             |          | 14                              |          | 97                     |          | 5                          |          |
| <b>2023</b>                                                                                                                |                                                       |          |                                                                  |          |                                                                        |          |                                                                |          |                                 |          |                        |          |                            |          |
| < 25                                                                                                                       | 10                                                    | 0.00151  | 8                                                                | -0.00354 | 11                                                                     | 0.00683  | 5                                                              | 0.00243  | 3                               | 0.00480  | 2                      | -0.01203 | 0                          | 0.00000  |
| 25 – 40                                                                                                                    | 56                                                    | 0.02308  | 44                                                               | -0.00827 | 42                                                                     | -0.00875 | 20                                                             | -0.00462 | 5                               | -0.00732 | 32                     | 0.00588  | 0                          | 0.00000  |
| 41 – 65                                                                                                                    | 13                                                    | -0.02309 | 23                                                               | 0.01017  | 19                                                                     | 0.00023  | 10                                                             | 0.00286  | 4                               | 0.00274  | 15                     | 0.00709  | 0                          | 0.00000  |
| > 65                                                                                                                       | 0                                                     | -0.00151 | 1                                                                | 0.00164  | 1                                                                      | 0.00170  | 0                                                              | -0.00067 | 0                               | -0.00023 | 0                      | -0.00093 | 0                          | 0.00000  |
| Total:                                                                                                                     | 79                                                    |          | 76                                                               |          | 73                                                                     |          | 35                                                             |          | 12                              |          | 49                     |          | 0                          |          |

Note: The frequency represents the number of responses per respondents' category, while residuals were calculated as the difference between the observed and expected proportions.

**Table S5.** Contingency table with corresponding residuals with regard to question number 14, in correlation to the occupation of respondents in both years of investigation.

| Would you participate in maintaining an urban garden in your neighborhood/part of the city, without monetary compensation? |                                                             |          |                                                                        |          |                                                                              |          |                                                                      |          |                                    |          |                        |          |                               |          |
|----------------------------------------------------------------------------------------------------------------------------|-------------------------------------------------------------|----------|------------------------------------------------------------------------|----------|------------------------------------------------------------------------------|----------|----------------------------------------------------------------------|----------|------------------------------------|----------|------------------------|----------|-------------------------------|----------|
|                                                                                                                            | Yes, if it were possible<br>for me to use produced<br>food. |          | Yes, if the produced<br>food is intended for<br>humanitarian purposes. |          | Yes, I consider it a great<br>opportunity for<br>socializing and relaxation. |          | Yes, if all the resources<br>needed for production<br>were provided. |          | No, I'm not interested<br>in that. |          | No, I don't have time. |          | Other: (write your<br>answer) |          |
| Occupation                                                                                                                 | Freq.                                                       | Res.     | Freq.                                                                  | Res.     | Freq.                                                                        | Res.     | Freq.                                                                | Res.     | Freq.                              | Res.     | Freq.                  | Res.     | Freq.                         | Res.     |
| 2021                                                                                                                       |                                                             |          |                                                                        |          |                                                                              |          |                                                                      |          |                                    |          |                        |          |                               |          |
| Pupil / student                                                                                                            | 14                                                          | -0.00407 | 17                                                                     | 0.00091  | 11                                                                           | -0.00678 | 14                                                                   | 0.00986  | 6                                  | 0.00802  | 12                     | -0.00631 | 0                             | -0.00162 |
| Employed                                                                                                                   | 68                                                          | -0.00605 | 70                                                                     | -0.00763 | 71                                                                           | 0.01606  | 39                                                                   | -0.00481 | 7                                  | -0.00551 | 69                     | 0.00468  | 5                             | 0.00326  |
| Unemployed                                                                                                                 | 21                                                          | 0.01148  | 20                                                                     | 0.00812  | 10                                                                           | -0.00807 | 7                                                                    | -0.00426 | 1                                  | -0.00232 | 13                     | -0.00337 | 0                             | -0.00158 |
| Retiree                                                                                                                    | 0                                                           | -0.00135 | 0                                                                      | -0.00140 | 0                                                                            | -0.00121 | 0                                                                    | -0.00079 | 0                                  | -0.00018 | 3                      | 0.00500  | 0                             | -0.00007 |
| Total:                                                                                                                     | 103                                                         |          | 107                                                                    |          | 92                                                                           |          | 60                                                                   |          | 14                                 |          | 97                     |          | 5                             |          |
| 2023                                                                                                                       |                                                             |          |                                                                        |          |                                                                              |          |                                                                      |          |                                    |          |                        |          |                               |          |
| Pupil / student                                                                                                            | 10                                                          | 0.00979  | 8                                                                      | 0.00442  | 6                                                                            | -0.00095 | 2                                                                    | -0.00316 | 0                                  | -0.00320 | 2                      | -0.00690 | 0                             | 0.00000  |
| Employed                                                                                                                   | 59                                                          | -0.00453 | 56                                                                     | -0.00671 | 56                                                                           | 0.00038  | 25                                                                   | -0.00553 | 9                                  | -0.00057 | 43                     | 0.01696  | 0                             | 0.00000  |
| Unemployed                                                                                                                 | 9                                                           | -0.00157 | 9                                                                      | -0.00046 | 8                                                                            | -0.00243 | 7                                                                    | 0.00860  | 2                                  | 0.00171  | 4                      | -0.00586 | 0                             | 0.00000  |
| Retiree                                                                                                                    | 1                                                           | -0.00369 | 3                                                                      | 0.00274  | 3                                                                            | 0.00300  | 1                                                                    | 0.00009  | 1                                  | 0.00206  | 0                      | -0.00420 | 0                             | 0.00000  |
| Total:                                                                                                                     | 79                                                          |          | 76                                                                     |          | 73                                                                           |          | 35                                                                   |          | 12                                 |          | 49                     |          | 0                             |          |

Note: The frequency represents the number of responses per respondents' category, while residuals were calculated as the difference between the observed and expected proportions.

**Table S6.** Contingency table with corresponding residuals with regard to question number 14, in correlation to the education of respondents in both years of investigation.

| Would you participate in maintaining an urban garden in your neighborhood/part of the city, without monetary compensation? |                                                       |          |                                                                  |          |                                                                        |          |                                                                |          |                                 |          |                        |          |                            |          |
|----------------------------------------------------------------------------------------------------------------------------|-------------------------------------------------------|----------|------------------------------------------------------------------|----------|------------------------------------------------------------------------|----------|----------------------------------------------------------------|----------|---------------------------------|----------|------------------------|----------|----------------------------|----------|
| Education                                                                                                                  | Yes, if it were possible for me to use produced food. |          | Yes, if the produced food is intended for humanitarian purposes. |          | Yes, I consider it a great opportunity for socializing and relaxation. |          | Yes, if all the resources needed for production were provided. |          | No, I'm not interested in that. |          | No, I don't have time. |          | Other: (write your answer) |          |
|                                                                                                                            | Freq.                                                 | Res.     | Freq.                                                            | Res.     | Freq.                                                                  | Res.     | Freq.                                                          | Res.     | Freq.                           | Res.     | Freq.                  | Res.     | Freq.                      | Res.     |
| 2021                                                                                                                       |                                                       |          |                                                                  |          |                                                                        |          |                                                                |          |                                 |          |                        |          |                            |          |
| Elementary school                                                                                                          | 1                                                     | -0.00106 | 1                                                                | 0.00209  | 1                                                                      | 0.00209  | 0                                                              | 0.00000  | 1                               | 0.00209  | 3                      | 0.00628  | 0                          | 0.00000  |
| High school                                                                                                                | 29                                                    | 0.00207  | 32                                                               | 0.00607  | 22                                                                     | -0.00632 | 16                                                             | -0.00067 | 2                               | -0.00378 | 29                     | 0.00548  | 0                          | -0.00284 |
| Bachelor studies                                                                                                           | 39                                                    | -0.00271 | 42                                                               | 0.00029  | 32                                                                     | -0.00835 | 26                                                             | 0.00529  | 8                               | 0.00528  | 37                     | -0.00198 | 3                          | 0.00218  |
| Master studies                                                                                                             | 26                                                    | 0.00435  | 22                                                               | -0.00596 | 23                                                                     | 0.00342  | 13                                                             | -0.00195 | 1                               | -0.00471 | 24                     | 0.00309  | 2                          | 0.00176  |
| Doctoral studies                                                                                                           | 8                                                     | -0.00265 | 10                                                               | 0.00078  | 14                                                                     | 0.01197  | 5                                                              | -0.00083 | 2                               | 0.00155  | 4                      | -0.00989 | 0                          | -0.00094 |
| Total:                                                                                                                     | 103                                                   |          | 107                                                              |          | 92                                                                     |          | 60                                                             |          | 14                              |          | 97                     |          | 5                          |          |
| 2023                                                                                                                       |                                                       |          |                                                                  |          |                                                                        |          |                                                                |          |                                 |          |                        |          |                            |          |
| Elementary school                                                                                                          | 0                                                     | -0.00226 | 1                                                                | 0.00309  | 1                                                                      | 0.00309  | 0                                                              | 0.00000  | 0                               | 0.00000  | 1                      | 0.00309  | 0                          | 0.00000  |
| High school                                                                                                                | 15                                                    | -0.00111 | 11                                                               | -0.01166 | 11                                                                     | -0.00986 | 6                                                              | -0.00249 | 3                               | 0.00206  | 17                     | 0.02306  | 0                          | 0.00000  |
| Bachelor studies                                                                                                           | 29                                                    | 0.00597  | 26                                                               | -0.00011 | 24                                                                     | -0.00311 | 11                                                             | -0.00306 | 6                               | 0.00583  | 15                     | -0.00552 | 0                          | 0.00000  |
| Master studies                                                                                                             | 24                                                    | 0.00258  | 21                                                               | -0.00396 | 24                                                                     | 0.00801  | 14                                                             | 0.01154  | 1                               | -0.00777 | 11                     | -0.01039 | 0                          | 0.00000  |
| Doctoral studies                                                                                                           | 11                                                    | -0.00518 | 17                                                               | 0.01482  | 13                                                                     | 0.00396  | 4                                                              | -0.00499 | 2                               | 0.00023  | 5                      | -0.00884 | 0                          | 0.00000  |
| Total:                                                                                                                     | 79                                                    |          | 76                                                               |          | 73                                                                     |          | 35                                                             |          | 12                              |          | 49                     |          | 0                          |          |

Note: The frequency represents the number of responses per respondents' category, while residuals were calculated as the difference between the observed and expected proportions.
